# Supplementary material for: Identification of 2-keto-3-deoxy-D-xylonate and 2-oxo-4-hydroxybutyrate as natural and artificial effectors of the transcription factors XynR and YjhI, respectively, and application to the development of biosensors for the bioproduction of 2,4-dihydroxybutyric acid in E. coli
Source: Research Square preprint supplement (doi:10.21203/rs.3.rs-8830407/v1), 2026-02-16
Supplement: Supplementary file 1 [file 040f274f019dd18e9fb74ebc.docx]

**Supplementary data**

**Identification of 2-keto-3-deoxy-D-xylonate as a natural inducer of the transcription factors XynR and YjhI and its application to the development of transcription-based biosensors for the bioproduction of non-natural 2,4-dihydroxybutyric acid in *E. coli*.**

Thibault MALFOY1*, Ceren ALKIM1*, Julie FREDONNET2 Juan LAJARIN-HERNANDEZ1

and Jean Marie FRANCOIS1,2$

1Toulouse BiotechnologyInstitute, UMR INSA -CNRS5504 and UMR INSA-INRAE 792, 135 avenue de Rangueil, 31077 Toulouse, France

2Toulouse White Biotechnology, UMS INRAE-INSA-CNRS, 135 Avenue de Rangueil, 31077 Toulouse, France

Email address

Thibault Malfoy [malfoy@insa-toulouse.fr](mailto:malfoy@insa-toulouse.fr)

Ceren Alkim [alkim@insa-toulouse.fr](mailto:alkim@insa-toulouse.fr)

Juan Lajarin-Hernandez [lajarin-hern@insa-toulouse.fr](mailto:lajarin-hern@insa-toulouse.fr)

Julie Fredonnet [Julie.fredonnet@inrae.fr](mailto:Julie.fredonnet@inrae.fr)

$Jean M François [fran_jm@insa-toulouse.fr](mailto:fran_jm@insa-toulouse.fr) or [jean-marie.francois@inrae.fr](mailto:jean-marie.francois@inrae.fr)

**Table S1:** Primers used in this study

| **Oligonucleotide** | **Sequence** | | |
| --- | --- | --- | --- |
| TM4 | | tcgggctttgTCAGGCCGGGTAGCCCAG |
| TM5 | | cccggcctgaCAAAGCCCGAAAGGAAGC |
| TM7 | | ctagctcgaGGACTGCACCGAGCCATC |
| TM8 | | tgcaagcttGAGATCTCCTTGCTGAATCATTTTG |
| TM9 | | catgagcggatacatatttg |
| TM10 | | aactaagatcggtactacgc |
| TM11 | | ggataacgcaggaaagaacaAAACCGGATGCATACGATTAAGGCG |
| TM12 | | TGTGAGCAAAAGGCCAGC |
| TM13 | | TGTTCTTTCCTGCGTTATCC |
| TM14 | | ttgctggccttttgctcacaGCGCCGCTACAGGGCGCG |
| TM15 | | ctatggaaaaacgccagc |
| TM16 | | gttgtttgtcggtgaacg |
| TM63 | | tttacggctagctcagtcctaggtatagtgctagcACTAGTgaaagaggagaaatactag |
| TM64 | | ctagtatttctcctctttcACTAGTgctagcactatacctaggactgagctagccgtaaa |
| TM65 | | ggggttccgcgcacatttccccgaaTTTACGGCTAGCTCAGTC |
| TM66 | | ggaaataatcatCTAGTATTTCTCCTCTTTCAC |
| TM67 | | ggagaaatactagATGATTATTTCCGCAGCC |
| TM68 | | tcgtgaggatgcgCTATGCCGCATTCCCTTTC |
| TM69 | | aatgcggcatagCGCATCCTCACGATAATATC |
| TM70 | | gtttcttagacgtcaggtggcacttGTTTCTACTGGTATTGGC |
| TM71 | | AAGTGCCACCTGACGTCTAAG |
| TM72 | | TTCGGGGAAATGTGCGCG |
| TM146 | | tggccttttgctc |
| TM233 | | CCTATATCGCCGACATCAC |
| TM234 | | GGATCCGAATTCGAGCT |
| TM242 | | aggcgccagcTAAAAATAGGCGTATCACG |
| TM243 | | attcggatccCATAGTTAATTTCTCCTCTTTAATG |
| TM250 | | cttcttaaagttaaaCgctagcataata |
| TM251 | | gagatataccATGAAAGCCAAC |
| TM252 | | TTTATGGCTAGCTCAGTCC |
| TM253 | | AAGACGAAAGGGCCTC |
| JFR64 | | GTGAGCAAAAGGCCAGACCTAGGGATA TATTCCGCTTCC |
| JFR65 | | CGTCAGGTGGCACTTttagacgtcgga attgccag |
| JFR66 | | CAGATTTCGTGATGCTTGTC |
| JFR67 | | ATGGTGAAAGTTGGAACCTC |
| 917 | | TATTAATTAGAGCTCATGGCTGACACTCGCCCTGAACGTCGCTTTA |
| 926 | | TATTAATTAAGCTTTTATTCCGCGTTTTCGTGAATATGTTTGCTGCTGGCG |
| Seq_R | | GTTCTTTCCTGCGTTATCCcc |
| Seq-F | | atgCCGATTATTCAGTCTGTTGAAC |
| seq_ xynR rbs01_R | | CTGAATAATCGGcatTCCAAACCTCCTCGAAAACGT |
| seq_xynR rbs01_J23119_R | | CTGAATAATCGGcatTCCAAACCTCCTGCTAGCATTATAC |
| seq-xynR rbs01_J23100_R | | CTGAATAATCGGcatTCCAAACCTCCTGCTAGCAC |
| seq_xynR rbs01 J23106_R | | CTGAATAATCGGcatAATGCTGGCATGTCCACG |
| seq_xynR rbs01_J23104_R | | CTGAATAATCGGcatTCCAAACCTCCTGCTAGCAC |
| seq-xynR_F | | AACGCAGGAAAGAACAAAACCGGATGCATACGATTAAGG |
| 1781-gRNA - lacZ | | ACTAGTATTATACCTAGGACTGAG |
| 2996-oligo-pTarget-asd | | GTCCTAGGTATAATACTAGTATCGGCTGGCGCGGTATGGTGTTTTAGAGCTAGAAATAGC |
| 2999-asd-vrf-F | | ATCTGATTCGGGTACTGATG |
| 3000-asd-vrf-rev | | GATAATAGCCAGGCATCCAT |
| 3116-vrf-yjhI-F | | CCTCATTCAATAAAGTGATAAGT |
| 3117-vrf-yjhI-R | | CGATCTGCTGGTAATAGT |
| 3131-amp-syfp2-F | | GGACTGCACCGAGCCATCTT |
| 3132-amp-syfp2-R | | CGGCGGATTTGTCCTACTCA |
| 3133-remove-2genes-F | | CTGAAAGGAGGAACTATATCCGGATTGG |
| 3134-remove-2genes-R | | TCGAggtgaagacgaaagggc |
| 3135-inf-pBS0-F | | tcgtcttcaccTCGAGACTGCACCGAG |
| 3136-inf-pBS0-R | | AGTTCCTCCTTTCAGcggcggatttgtcctact |
| 3126-xynR-remove-F | | CTGAAAGGAGGAACTATATCCGGATTGG |
| 3127-xynR-remove-R | | GTTCTTTCCTGCGTTATCCcct |
| 3128-yjhI-infusion-F | | AACGCAGGAAGAATCCACACACTACGATGTTGAACA |
| 3129-yjhI-infusion-R | | AGTTCCTCCTTTCAGCAAAAAACCCCTCAAGACCCGT |
| 3130-amp-yjhI-F | | ATCCACACACTACGATGTTG |
| 3137-ter7-pour yjhI-R | | CAAAAAACCCC………CCTTTTCGTAAGTGC* |
| 3146-enlever-yagE-F | | AAGCTTTCCAACTTAAATACAAGGAAAATAAGGAG |
| 3147_pyjhI_inf_F | | TCGTCTTCACCTCGATCCACACACTACGATGTTGCAACA |
| 3149_pBS8_inf_R | | TAAGTTGGAAAGCTTAATGGCTCCTCCTTGCTCATG |
| 3150_yagF_vrf_F | | CGCAGATGTATCAGCTGGAT |
| 3151_yagF_vrf_R | | TGCCGAATTACAACATCGTG |
| 3152_yjhG_vrf_F | | ATACAGCATGCAGTGTGTCG |
| 3153_yjhG_vrf_R | | GATGGCGACAGCAATCGAGA |
| 3154_pBS7_over_F | | TATCCACAGAATCAGGGGATAACGCAGGAAAGAACCTGAAAGGAGGAACTATATCCGGATTGGCG |
| 3155_pBS7_over_R | | GTTCTTTCCTGCGTTATTCCCCTGATTCTGTGGATAACCGTATTACCGCCT |
| 3159_del_v_xynR_F | | GTATCAGGTGAACGCGCAGA |
| 3160_del_v_xynR_R | | GGGCTGACCTGCTACTACAA |
| 3164_del_v_yjhI_F | | CTGTAGCAACACTATCATGT |
| 3165_del_v_yjhI_R | | GATCTGCTGGTAATAGTCGT |

**Table S2:** Genetic modifications of the promoter and RBS of the XynR-based biosensor

| **name** | | **Synthetic DNA fragments** | | | | | | |
| --- | --- | --- | --- | --- | --- | --- | --- | --- |
| pBioS-JF1 (pBS3) | seq Pxynr:RBSxynR | | AAAACCGGATGCATACGATTAAGGCGGTGATGATGGCAACGCTTGGGGAGTGATTGGGTCCGCTGCGCGTTGGTGCCCTCACCCCGGCCCTCTCCCACAGGGAGAGGGAGAACACCGGCTCCATTTCATTGATTTTTCATCCCGAAAAAGGTACGTTTTCGCCTTAATTCCAGCGTGGACATGCCAGCATT | | | |  |  | |  |
| pBioS-JF2 | seq PxynR : RBSO1 | | AAAACCGGATGCATACGATTAAGGCGGTGATGATGGCAACGCTTGGGGAGTGATTGGGTCCGCTGCGCGTTGGTGCCCTCACCCCGGCCCTCTCCCACAGGGAGAGGGAGAACACCGGCTCCATTTCA**ttgatttttcatcccgaaaaaggtacgttttcg**AGGAGGTTTGGA |  |  |  |  |  | |  |
| pBioS-JF3 | seq PJ23119: RBSO1 | | AAAACCGGATGCATACGATTAAGGCGGTGATGATGGCAACGCTTGGGGAGTGATTGGGTCCGCTGCGCGTTGGTGCCCTCACCCCGGCCCTCTCCCACAGGGAGAGGGAGAACACCGGCTCCATTTCA**ttgacagctagctcagtcctaggtataatgctagc**AGGAGGTTTGGA |  |  |  |  |  | |  |
| pBioS-JF4 | seq Pj23100:RBSO1 | | AAAACCGGATGCATACGATTAAGGCGGTGATGATGGCAACGCTTGGGGAGTGATTGGGTCCGCTGCGCGTTGGTGCCCTCACCCCGGCCCTCTCCCACAGGGAGAGGGAGAACACCGGCTCCATTTCA**ttgacggctagctcagtcctaggtacagtgctagc**AGGAGGTTTGGA |  |  |  |  |  | |  |
| pBioS-JF5 | seq Pj23104: RBSO1 | | AAAACCGGATGCATACGATTAAGGCGGTGATGATGGCAACGCTTGGGGAGTGATTGGGTCCGCTGCGCGTTGGTGCCCTCACCCCGGCCCTCTCCCACAGGGAGAGGGAGAACACCGGCTCCATTTCA**ttgacagctagctcagtcctaggtattgtgctagc**AGGAGGTTTGGA |  |  |  |  |  | |  |
| pBioS-JF6 | seq Pj23106:RBSO1 | | AAAACCGGATGCATACGATTAAGGCGGTGATGATGGCAACGCTTGGGGAGTGATTGGGTCCGCTGCGCGTTGGTGCCCTCACCCCGGCCCTCTCCCACAGGGAGAGGGAGAACACCGGCTCCATTTCA**tttacggctagctcagtcctaggtatagtgctagc**AGGAGGTTTGGA |  |  |  |  |  | |  |

In bold are the sequence of the synthetic promoter. RBS sequence is underlined

**Table S3**: Expression changes of the D-xylonate metabolic genes from the cryptic CP4-6 prophage regulated by *xynR* (*yagI*) and from the KpLE2 phage-like element regulated by *yjhI* in *E. coli* under fermentation process of 2,4-DHB production or in response to challenge with 1 M 2,4-DHB

|  | **Fermentation condition***  Value in fold change | | | **Toxicity condition**$  value in fold change | |
| --- | --- | --- | --- | --- | --- |
| **Gene name** | T12/T2 | T28/T2 | T58/T2 | T30/T0 | T180/T0 |
| *xynR(yagI)* | 0.9 | 1.08 | 0.40 | 1.05 | 0.65 |
| *yagE* | 11.2 | 13.6 | 2.2 | 2.2 | 1.3 |
| *yagF* | 8.3 | 9.1 | 1.2 | 2.9 | 1.8 |
| *yagG* | 1.9 | 2.2 | 1.3 | 2.0 | 1.9 |
| *yagH* | 1.7 | 2.1 | 1.1 | 2 | 1.9 |
| *yjhI* | 8.7 | 7.4 | 1.3 | 4.7 | 1.7 |
| *yjhH* | 3.6 | 2,0 | 1,2 | 1.8 | 1.1 |
| *yjhG* | 2.5 | 1,4 | 1,1 | 3.1 | 2.0 |
| *yjhF* | 2,5 | 1,4 | 1,1 | 3,1 | 2.0 |

*Fermentation was carried out with a *E. coli* MG1655 strain expressing the homoserine-2,4-DHB pathway (Walther et al. 2018) in a M9 medium with glucose alimentation in a fed batch mode. Samples were taken after 2, 12, 28 and 54 hr of culture for transcriptomic analysis using *E. coli* Agilent gene chips (Alkim et al. 2022). The data are the mean of two technical replicates from 2 biological experiments.

$Toxicity experiments were carried out with *E. coli* MG1655 cultivated in M9 medium with 0.4 % glucose. In mid log phase (OD6001.0), the cells were challenged with 1 M 2,4-DHB ammonium. Samples were taken at 30 and 180 min after addition 1 M 2,4-DHB or 1M ammonium sulphate used as control. Transcriptomic analysis was carried out using E. coli Agilent gene chips from three biological experiments according to (Alkim et al. 2022).


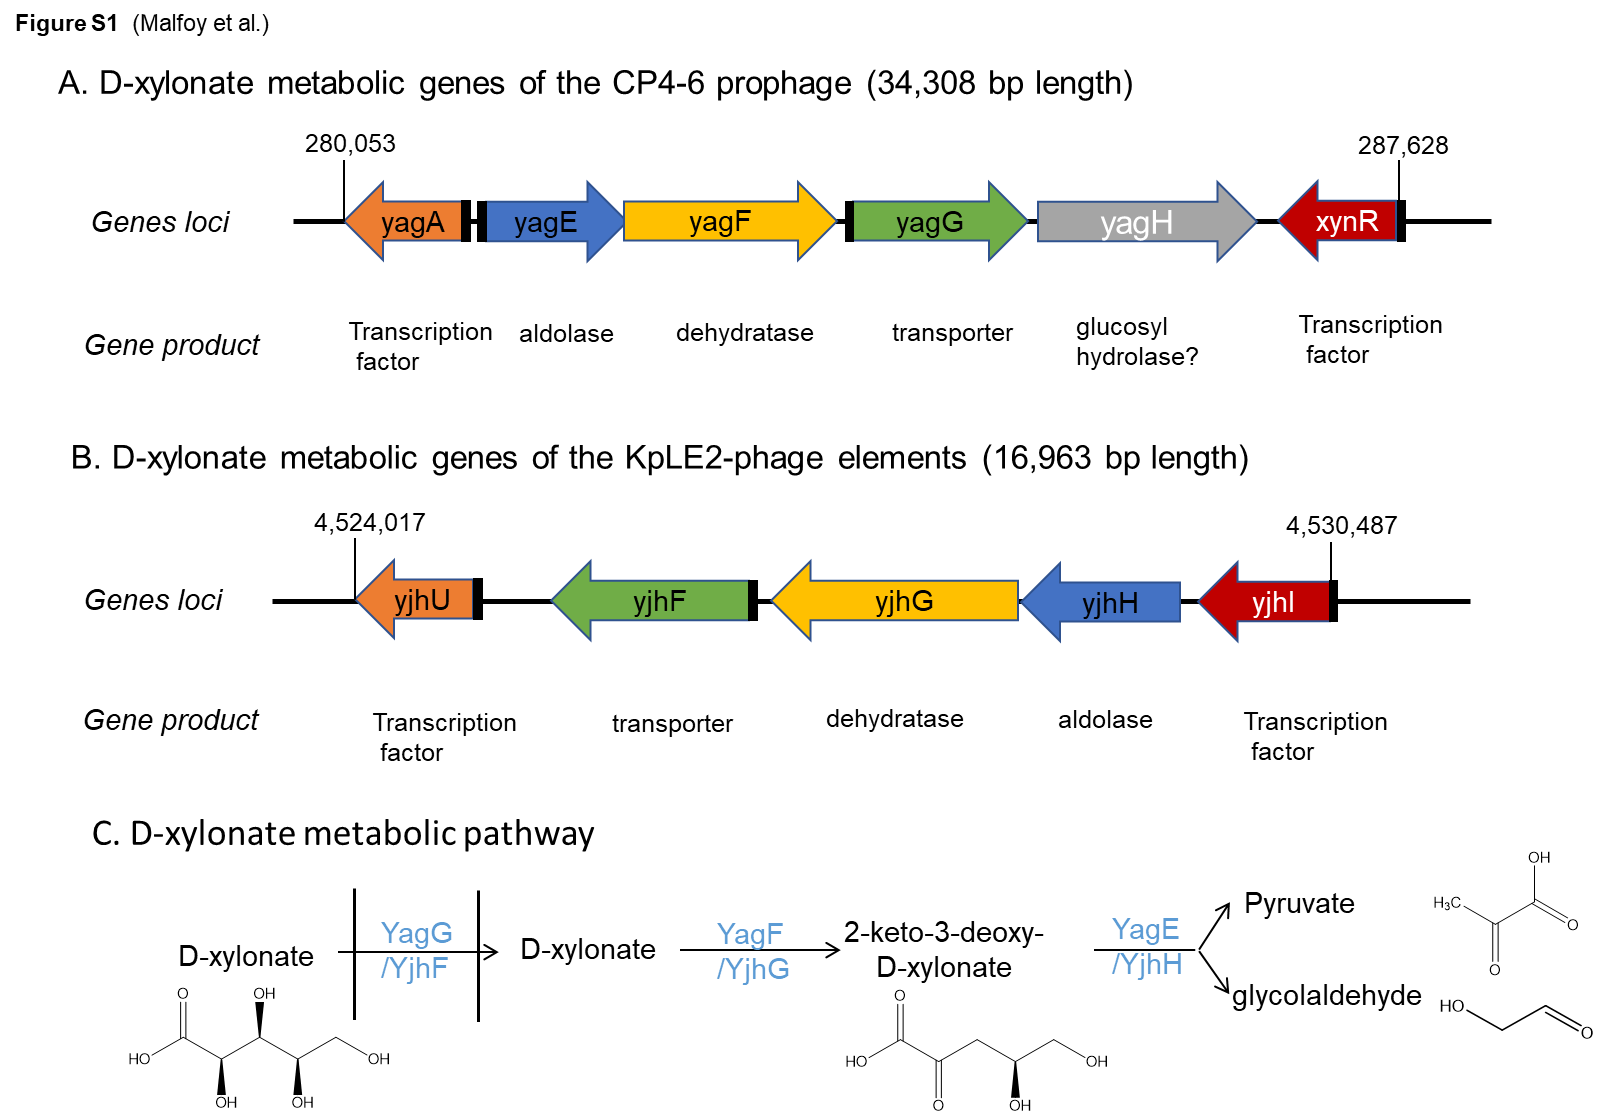


**Figure S1:** **Scheme of the D-xylonate metabolic genes that are regulated by XynR or YjhI transcription factor-**. (A) D-xylonate metabolic genes in the 34,308 bp genomic structure of the CP4-6 cryptic prophage that are under the control of DNA binding transcriptional repressor encoded by *xynR*. (B) D-xylonate metabolic genes in the 19,963 KplE2-phage elements that are under the DNA binding transcriptional activator encoded by *yjhI*. (C) D-xylonate catabolic pathway


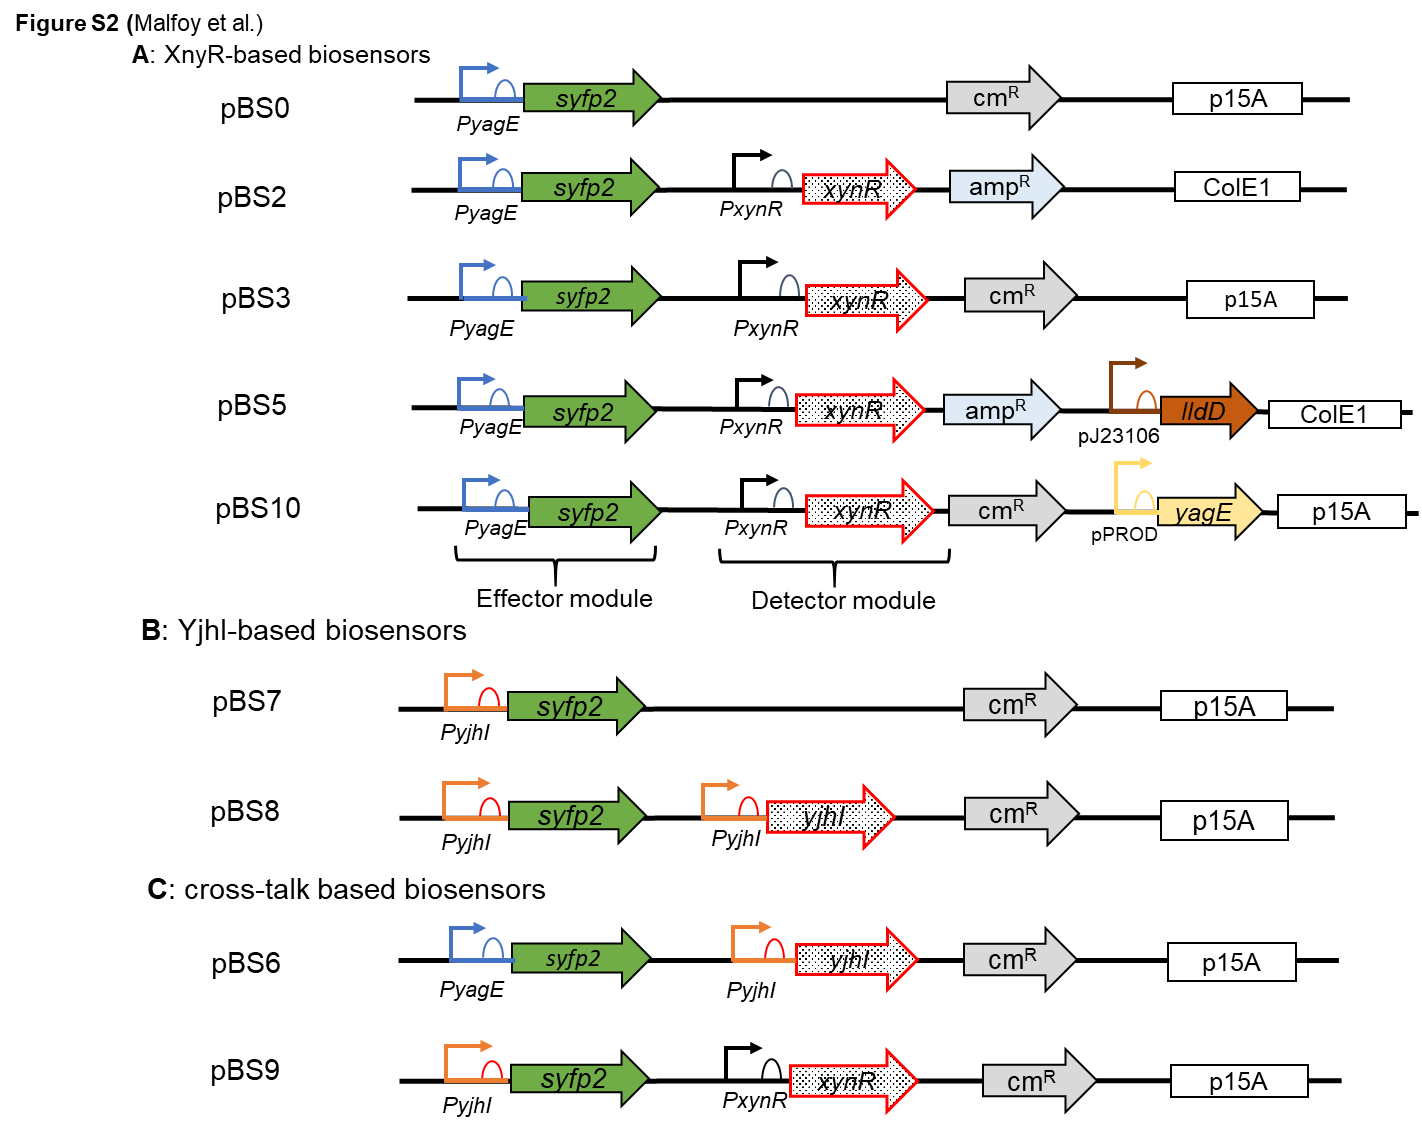


**Figure S2:** **scheme of the transcription factor -based biosensor.** (A) Description of the genomic construction of the xynR-based metabolite biosensor carried on medium copy (pBS3) plasmid. The syfP2 reporter gene was flanked upstream by a 300 bp of corresponding to XynR-sensitive promoter region of *yagE*. The gene *lldD* encoding L-lactate oxidase was inserted into pBS2 under the strong synthetic promoter pJ23106 to yield pBS5. The gene *yagE* which encodes a pyruvate -dependent aldolase of the XynR-operon was inserted in pBS3 under the strong constitutive ProD promoter. (B) Description of the genomic construction of the YjhI-based metabolite biosensor carried on medium copy (pBS7) plasmid. (C) description of genomic construction of cross-talk based biosensors.


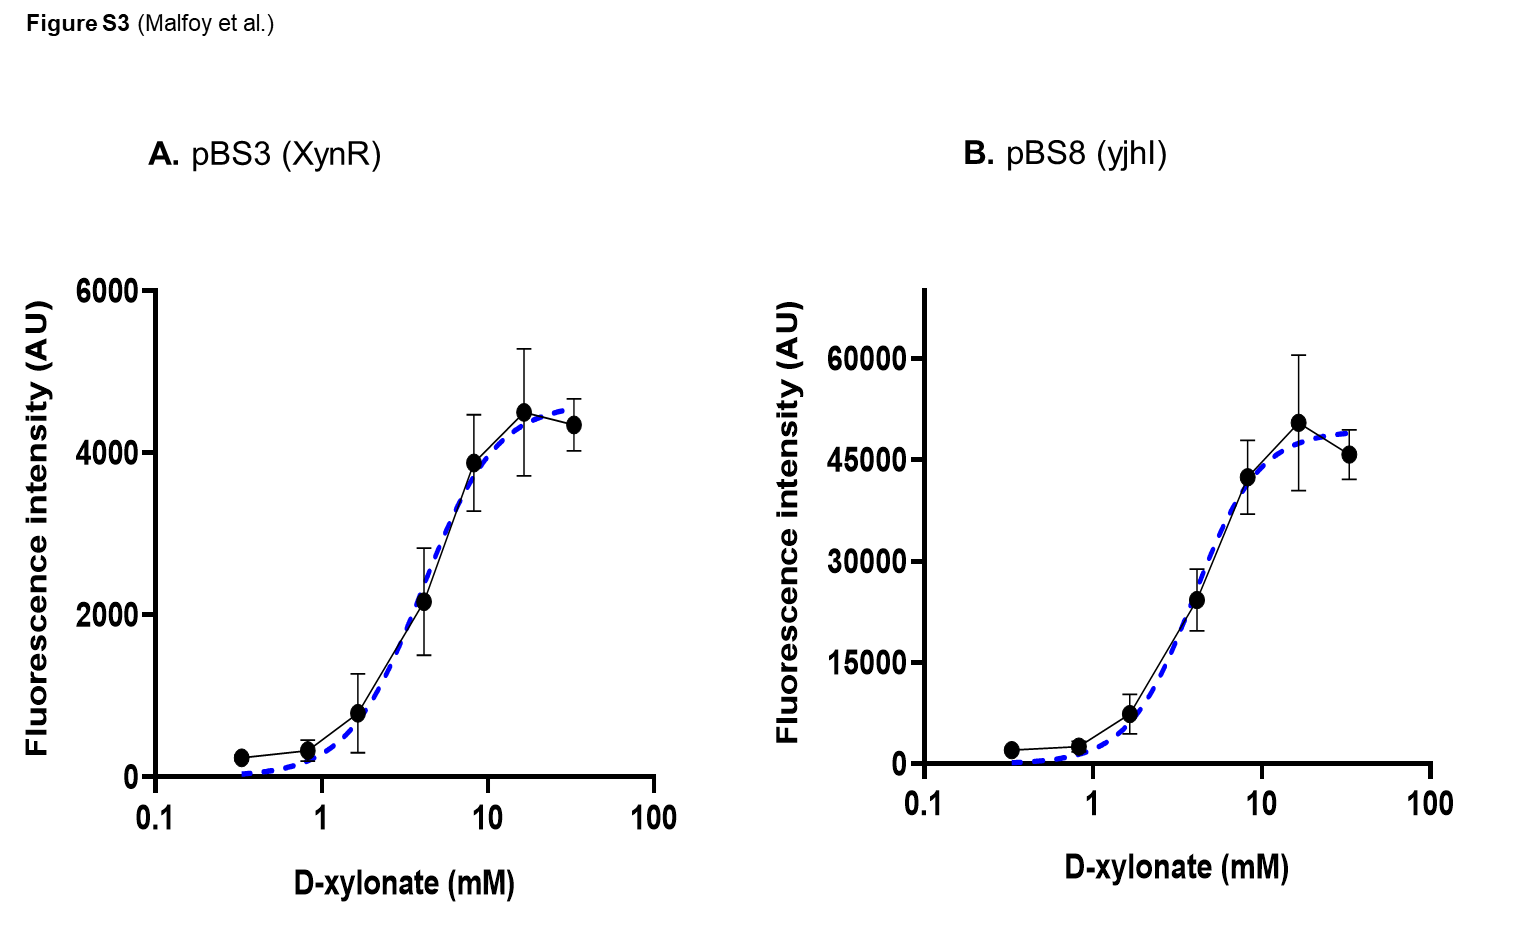


**Figure S3: Dose-response curves of XynR- and YjhI-based biosensor to D-xylonate.** The strain used for dose-response to D-xylonate was MG7 transformed with pBS3 and pBS8. The fluorescence was measured by spectrofluorometer over 15 h and values at 12 h after addition of the effectors were used for dose-response analysis, using Graph Pad prism for analysis and graph representation. Data are the mean ± SD (shown by bars on the curves) of four biological replicates


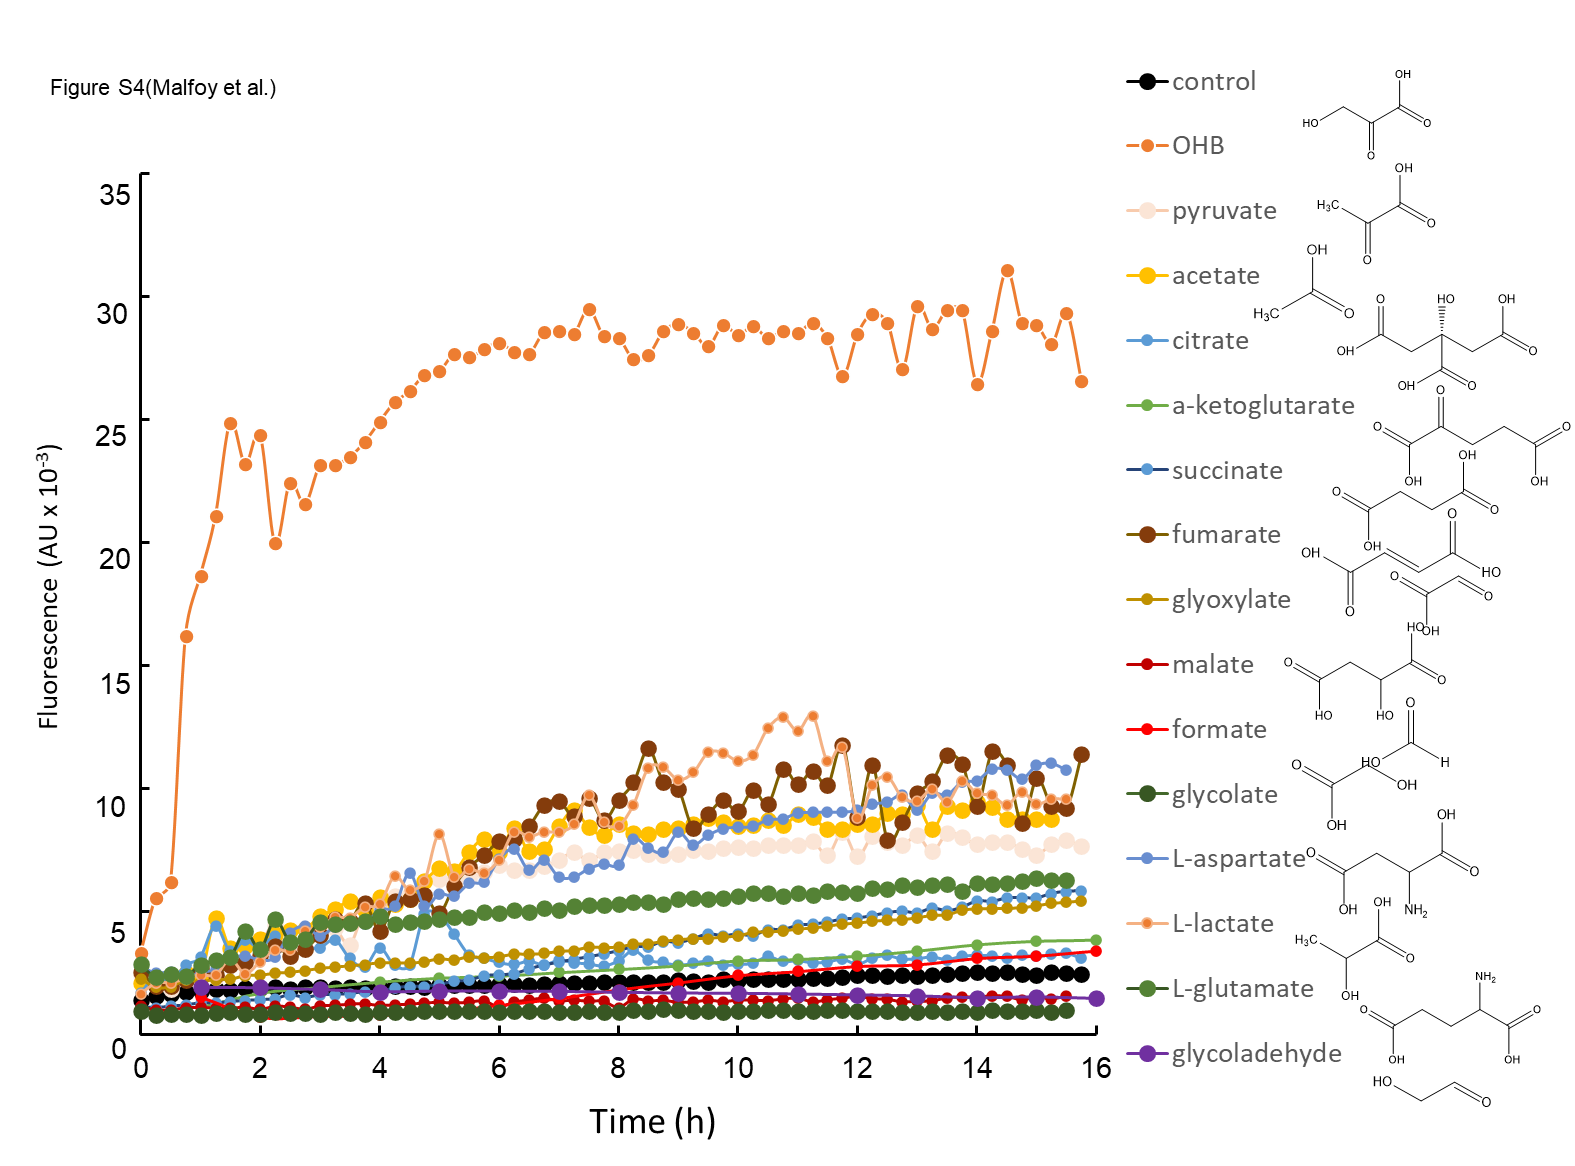


**Figure S4: Kinetic of fluorescence response of XynR-based biosensor to various metabolites.** The strain MG7 transformed with pBS3 was incubated in the presence of various metabolites added at 10 mM except OHB which was 1 mM). The fluorescence was monitored over time from three independent replicates. Data reported are the mean of the three biological replicates and SD has been removed to simplify the visualisation of the figure but overall, the CV for each curve was in the range of 10 %


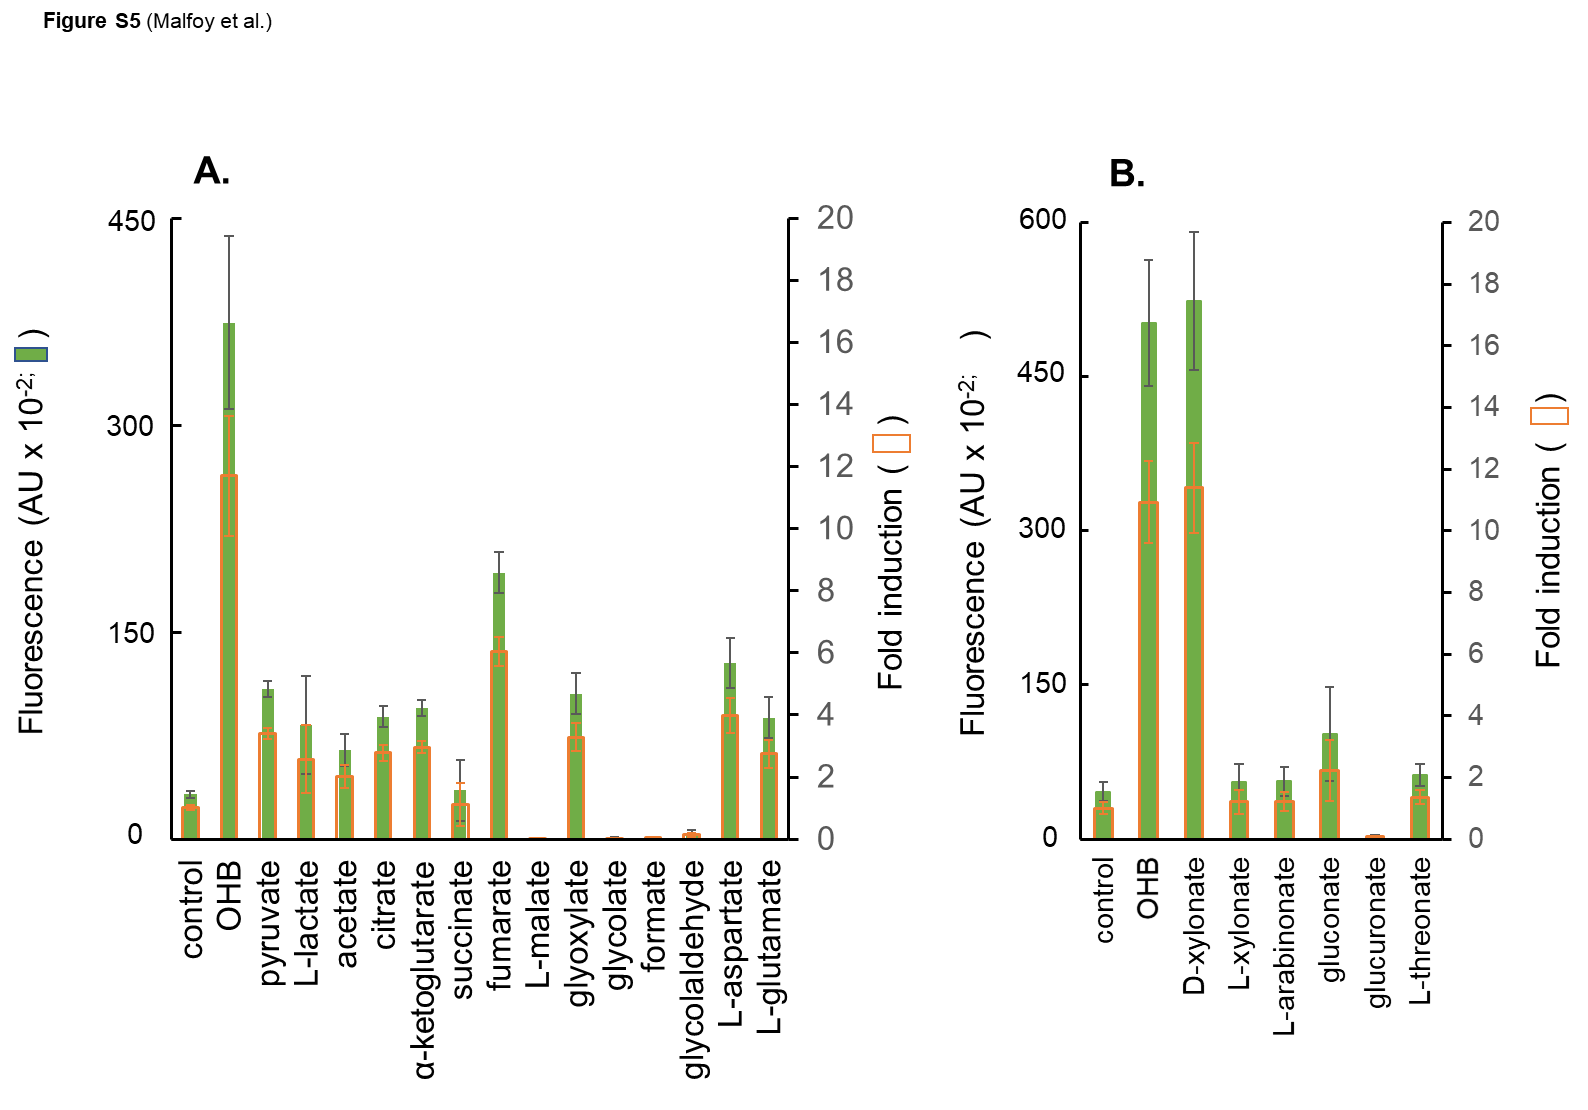


**Figure S5: The YjhI-based biosensor is highly specific to OHB.** In (A) is reported the fluorescence measured after 12 h incubation of the strain MG7 transformed with pBS8 in the presence of various intracellular metabolites added at 10 mM except for OHB (1 mM). (B) is the same as (A) except that various sugar acids with similarity to D-xylonate were tested. Data are the mean ± SD (shown by bar on the histogram) of three biological replicates.


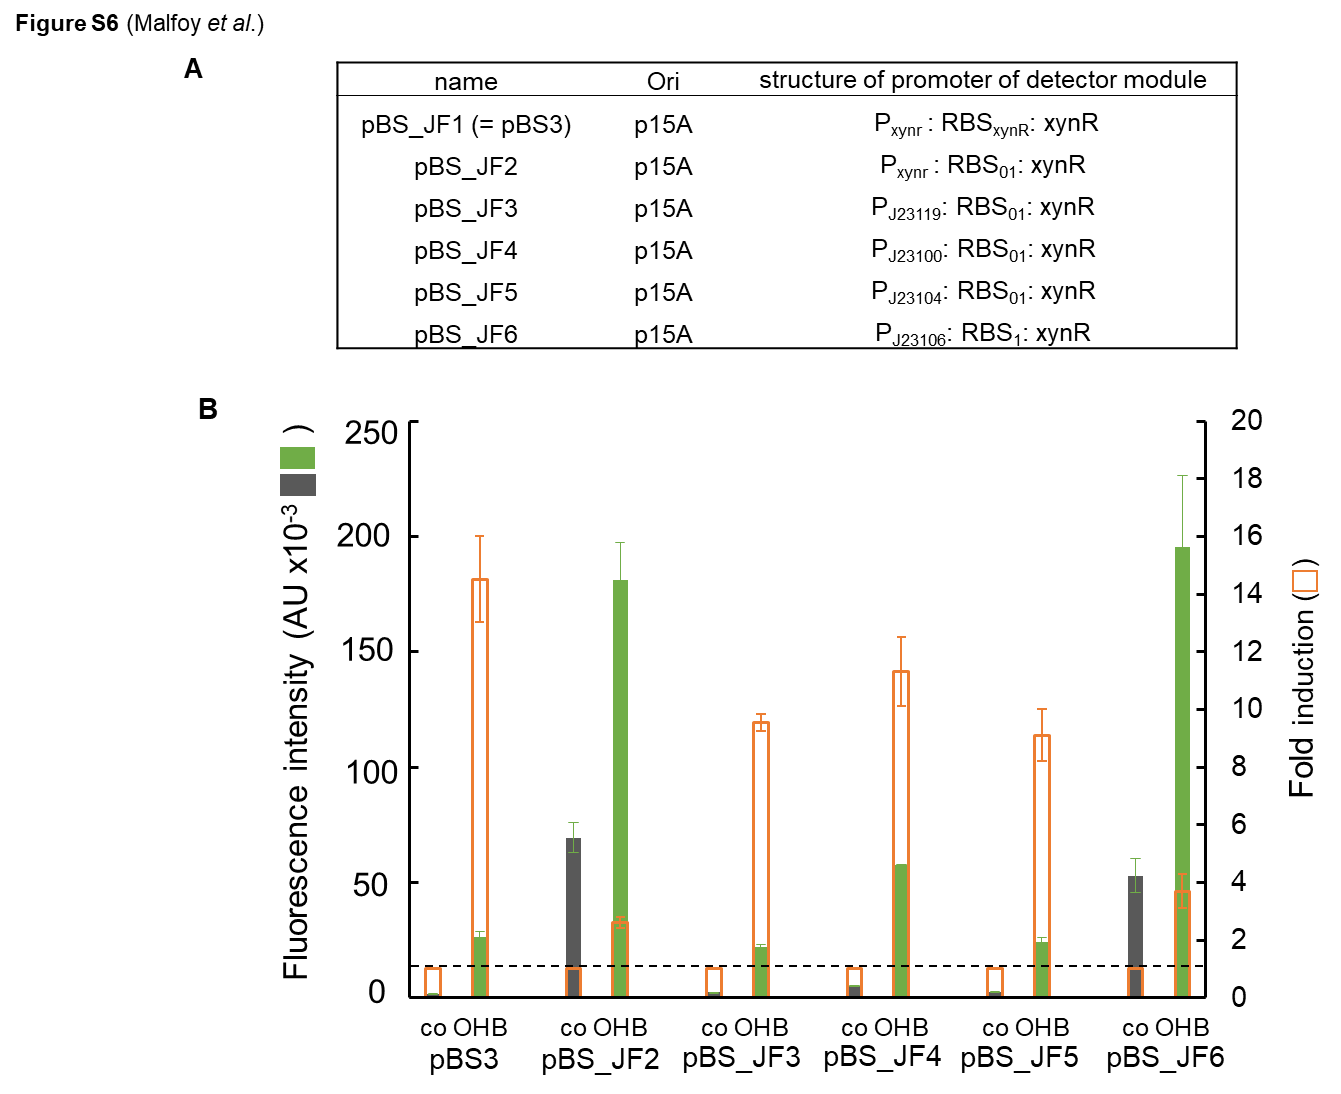


**Figure S6: Effect of promoter strength on the dynamic response of the XynR-based biosensor to D-xylonate and OHB. In** (**A**) is reported the structure of the XynR promoter and the name of the corresponding medium copy plasmid. In (**B**) is provided the fluorescence of MGΔ7 strain transformed by the different genetic constructs after 12 h incubation with 1 mM OHB. (**C**) is the same as (**B**) except that KDX was used at 1 mM. Data are the mean ± SD (shown by bars on the histogram) of three biological replicates.


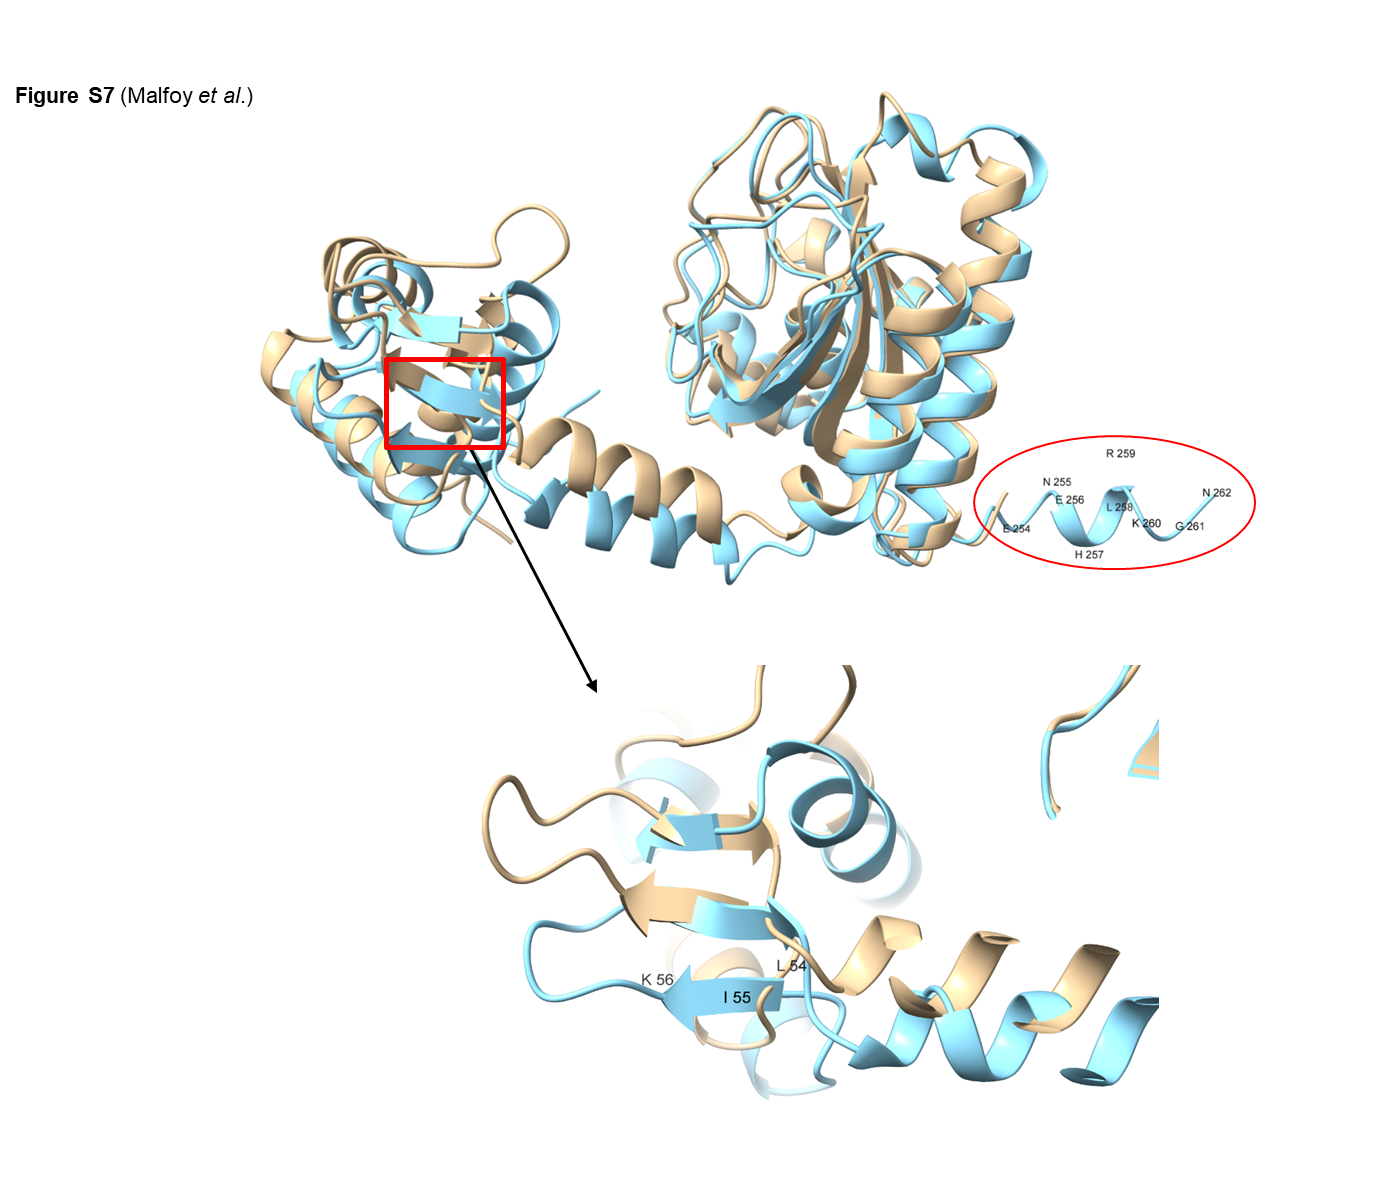


**Figure S7:** Alphafold modelled structure of XynR and YjhI transcription factors from *E. coli*. Overlay of the two structures are presented, with XynR in faint brown and YjhI in blue. As red rectangle and a red circle are highlighted differences in protein sequence/ structure between YjhI and XynR.

**References cited**

Alkim C, Farias D, Fredonnet J, Serrano-Bataille H, Herviou P, Picot M, Slama N, Dejean S, Morin N, Enjalbert B, Francois JM (2022) Toxic effect and inability of L-homoserine to be a nitrogen source for growth of Escherichia coli resolved by a combination of in vivo evolution engineering and omics analyses. Front Microbiol 13:1051425 doi:10.3389/fmicb.2022.1051425

Walther T, Calvayrac F, Malbert Y, Alkim C, Dressaire C, Cordier H, Francois JM (2018) Construction of a synthetic metabolic pathway for the production of 2,4-dihydroxybutyric acid from homoserine. Metab Eng 45:237-245 doi:10.1016/j.ymben.2017.12.005
